# Supplementary material for: Unprecedented application of lead zirconate titanate in degradation of Rhodamine B under visible light irradiation
Source: Royal Society of Chemistry journal article supplement (doi:10.1039/b516823f), 2006-01-01
Supplement: b516823f.pdf [file b516823f.pdf]

## Electronic Supplementary Information

### for

# Unprecedented application of lead zirconate titanate in degradation of Rhodamine B under visible light irradiation

**Fig. S1.** UV-Vis diffuse reflection spectra of different photocatalysts, (a) TiO<sub>2</sub> (b) PZT / TiO<sub>2</sub> (5% PZT) (c) PZT (d) Band gap of PZT. The adsorption of visible light (from 400 nm to 800 nm) to PZT / TiO<sub>2</sub> composite are clearly more than TiO<sub>2</sub> itself. The plot of transformed Kubelka-Munk function versus the energy of light for PZT affords band gap energies of 2.5 eV.<sup>1</sup>

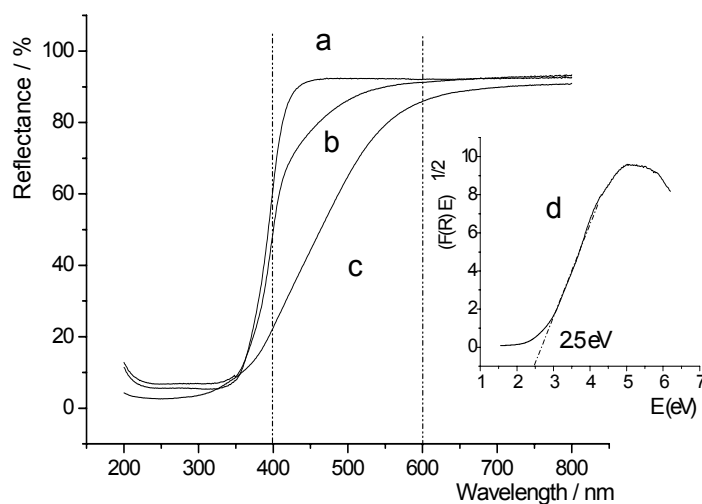

**Fig. S2.** Degradation of RhB with PZT / TiO<sub>2</sub> (5 mol% PZT) and TiO<sub>2</sub> in dark. There are almost no variance of after 40 minutes which can be seen from the figure. The concentration of Rhodamine B with PZT/TiO<sub>2</sub> is a little more than Rhodamine B with TiO<sub>2</sub> after 40 minutes.

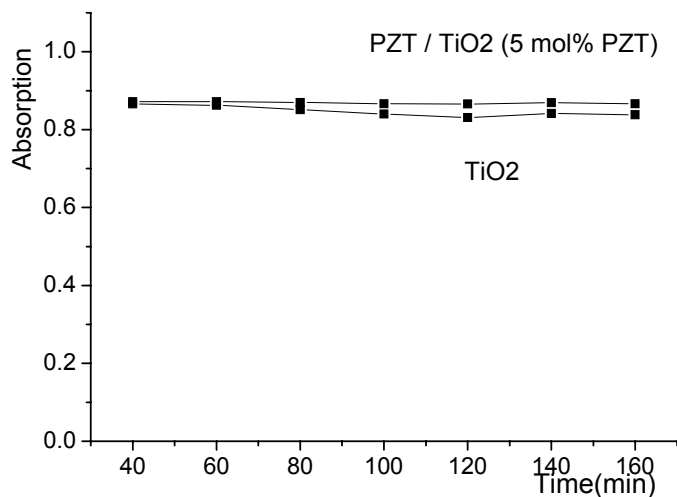

**Fig. S3.** UV-Vis transmission spectra of two filters which are set between light source and pyrex glass vessel. Apparently, no ultraviolet ray will be permeated.

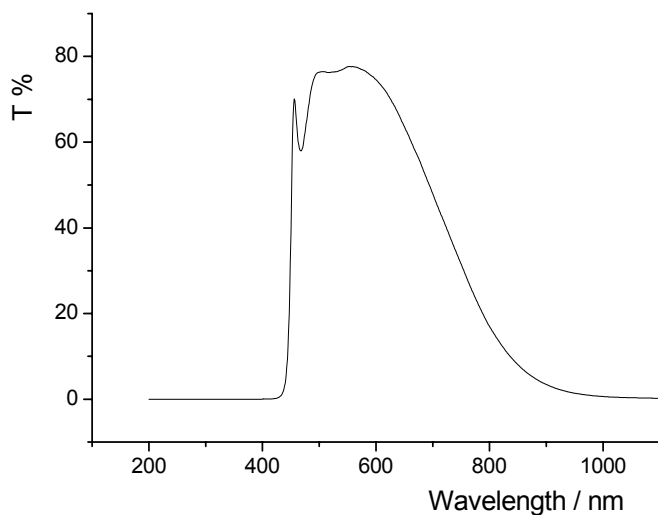

**Fig. S4.** X-ray powder diffraction patterns, (a) PZT; (b) PZT / TiO<sub>2</sub> (5% PZT), (c) self-made TiO<sub>2</sub>.

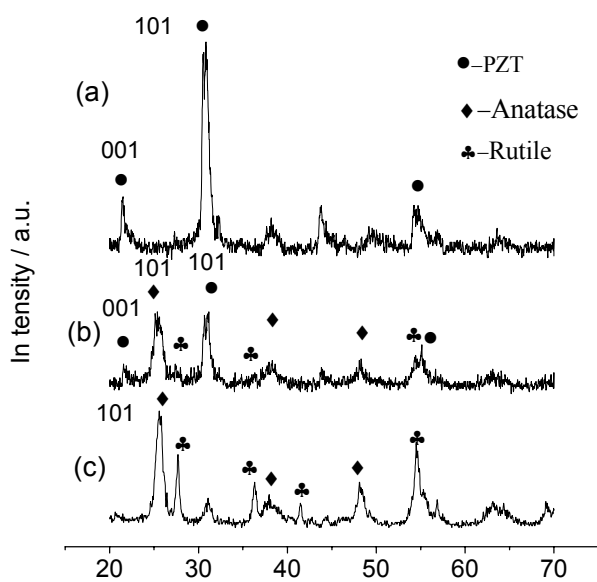

**Fig. S5.** The influence of  $\text{H}_2\text{O}_2$  in Photocatalytic degradation of RhB on PZT /  $\text{TiO}_2$  composite in aqueous solution. (a) PZT /  $\text{TiO}_2$  (5%) with 0.2ml  $\text{H}_2\text{O}_2$  in dark; (b) RhB with 0.2 ml  $\text{H}_2\text{O}_2$  under visible light. (c) PZT with 0.2 ml  $\text{H}_2\text{O}_2$  under visible light. (d) PZT /  $\text{TiO}_2$  (5%) unde visible light; (e) PZT /  $\text{TiO}_2$  (5%) with 0.2ml  $\text{H}_2\text{O}_2$  under visible light. Either the experiment is conducted in dark or solely with  $\text{H}_2\text{O}_2$  under visible light, there are almost no degradation can be found from the figure. However, a remarkable decrease of concentration of RhB can be observed during visible irradiation. Especially, The activity of compostie was obviously increased with only a little of  $\text{H}_2\text{O}_2$ .

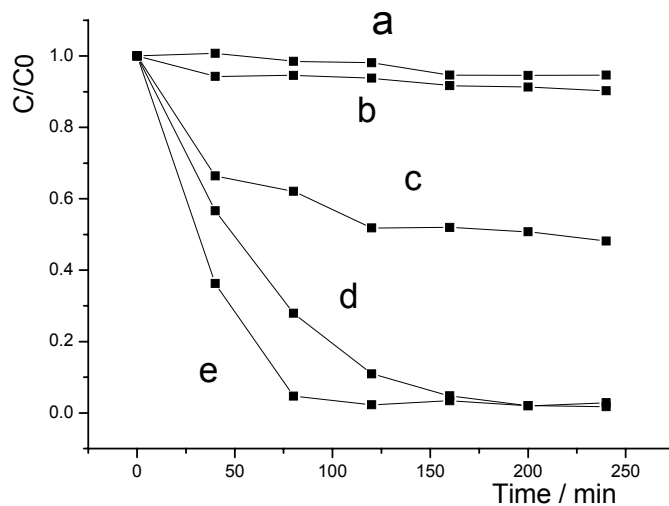

## Reference

- 1 Wei Zhao, Wanhong Ma, Chuncheng Chen, Jincai Zhao, and Zhigang Shuai, *J. Am. Chem. Soc.*, 2004, **126**, 4782.
